# Supplementary material for: Improvement of lipidic bicontinuous cubic phases by the addition of a zwitterion with strong hydration ability and kosmotropicity
Source: Royal Society of Chemistry journal article supplement (doi:10.1039/c8nj05459b), 2019-01-01
Supplement: c8nj05459b1.pdf [file c8nj05459b1.pdf]

## Improvement of lipidic bicontinuous cubic phases by the addition of a zwitterion with strong hydration ability and kosmotropicity

Rika Takeuchi <sup>a</sup> and Takahiro Ichikawa <sup>\*a</sup>

<sup>a</sup>Department of Biotechnology, Tokyo University of Agriculture and Technology, Nakacho, Koganei, Tokyo 184-8588, Japan

### Young-Laplace method<sup>[S1,S2]</sup>

Outline shapes of liquid surface are expressed by using the Young-Laplace equation. In the case of the pendant drop method, it is supposed that Young-Laplace equation are written by those simultaneous differential equation.

$$\frac{dx}{ds} = \cos\Phi$$

$$\frac{dz}{ds} = \sin\Phi$$

$$\frac{d\Phi}{ds} = 2 + \beta z - \frac{\sin\Phi}{x}$$

In this regard,  $\beta$  is the shape factor that is defined by the formula below.

$$\beta \equiv -\frac{\Delta\rho g b^2}{\gamma}$$

$b$ : a radius of principal curvature at the low point of a pendant drop (the point of origin)

$s$ : a length of an arc from at the point of origin

$x$ : x-coordinate of an outline curve

$z$ : z-coordinate of an outline curve

$\Phi$ : an angle between a normal line of an outline curve and a vertical line

$\gamma$ : a surface tension of liquid

$\Delta\rho$ : a density difference between a pendant drop phase and an environment phase

$g$ : acceleration of gravity

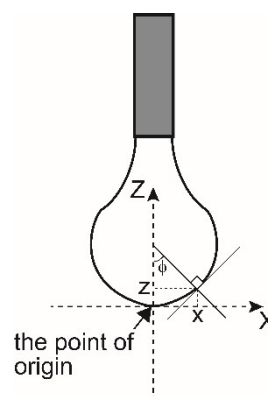

When it is appropriate that the outline shape of a pendant drop obeys the Young-Laplace equation,  $\beta$  and  $b$  are calculated by analyzing the observed outline shape, and then  $\gamma$  (surface tension) can be calculated in combination with  $\Delta\rho$ . Precise surface tension can be obtained by fitting numerous coordinates (several hundred points) of the outline curve and the Young-Laplace theoretical curve.

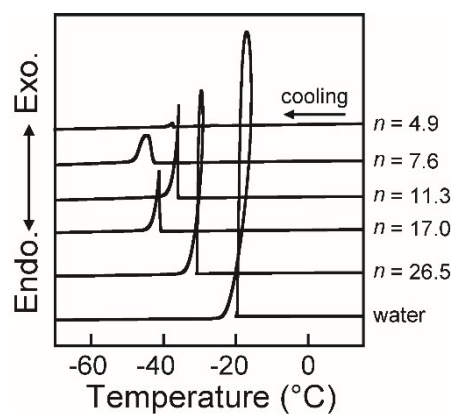

**Fig. S1** DSC thermograms of **ImZI- $n$ H<sub>2</sub>O** on 1st cooling.

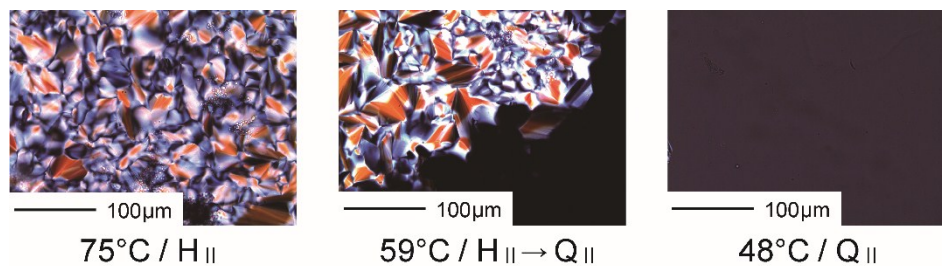

**Fig. S2** POM images of the **MO/water/ImZI** mixtures in the ratio of 70/27/3 by weight at various temperatures.

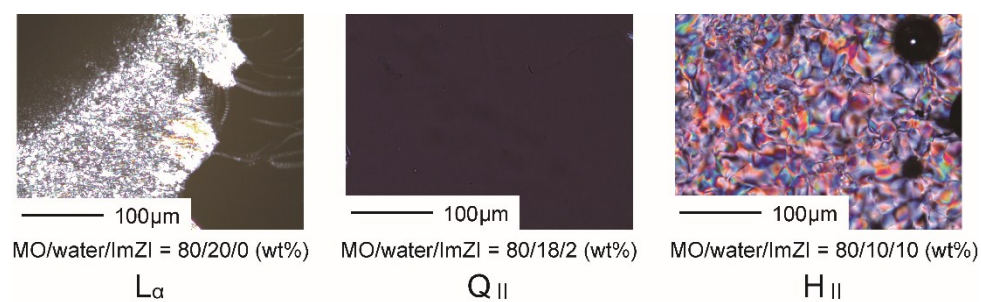

**Fig. S3** POM images of the **MO/water/ImZI** mixtures at 30 °C in the various component ratios.

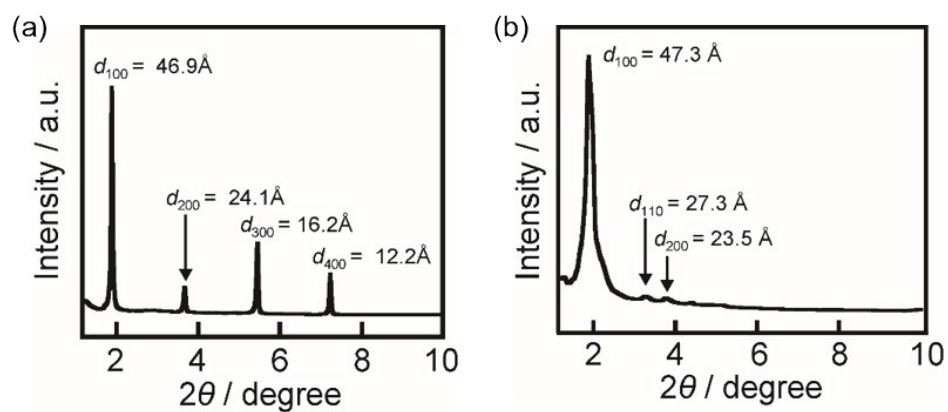

**Fig. S4** (a) X-ray diffraction pattern of the **MO**/water mixture in the ratio of 70/30 by weight at 30 °C after 2 days at ambient condition. It shows a  $L_\alpha$  phase. (b) X-ray diffraction pattern of the **MO**/water/**ImZI** mixture in the ratio of 60/24/16 by weight at 30 °C. It shows a  $H_{II}$  phase.

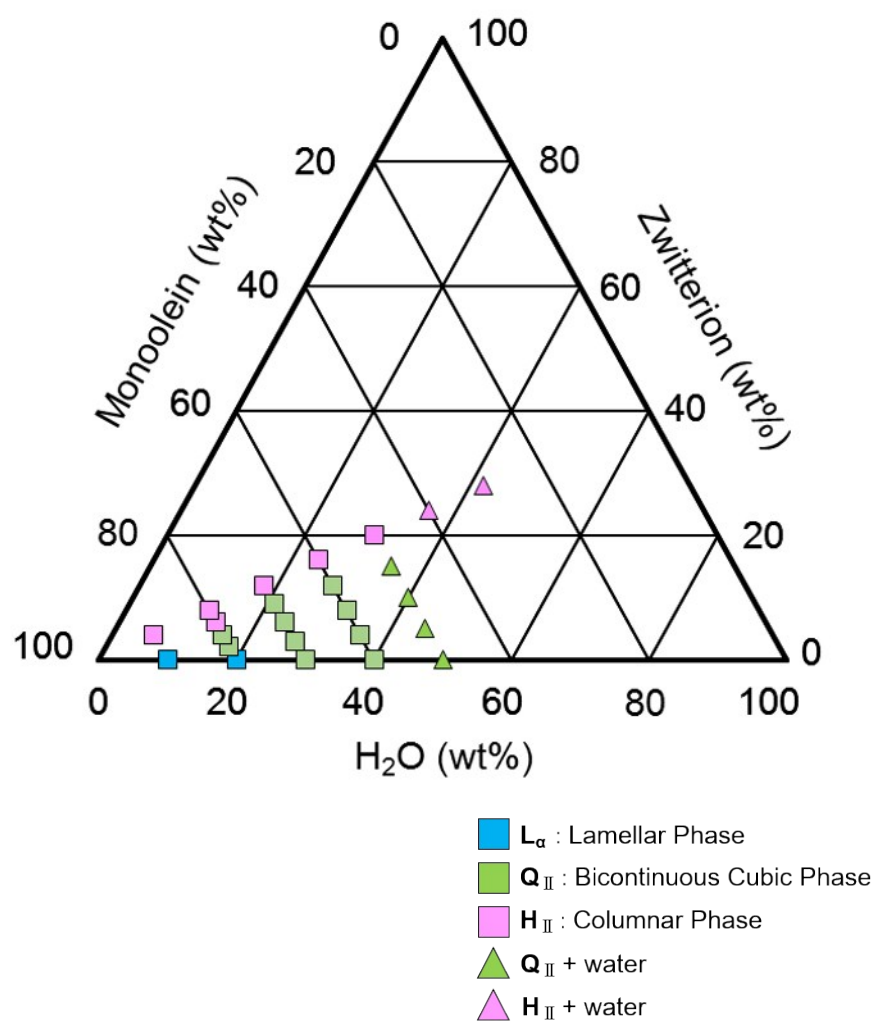

**Fig. S5** Triangular diagram of the **MO/water/ImZI** mixtures.

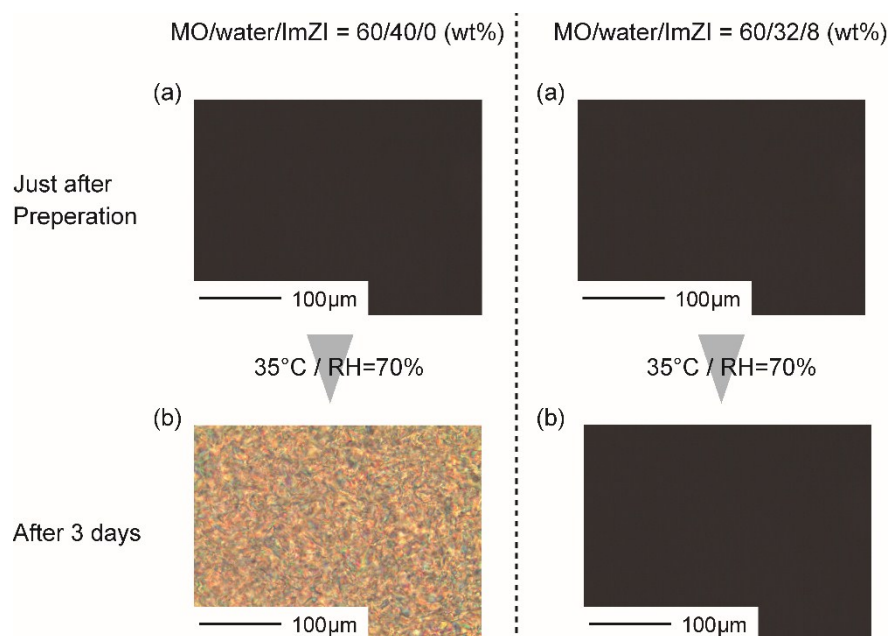

**Fig. S6** POM images of the **MO/water/ImZI** mixtures in the ratio of 60/40/0 and 60/32/8 by weight. (a) just after preparation and (b) after 3 days.

## References

- [S1] Y. Rotenberg, L. Boruvka and A. W. Neumann, *J. Colloid Interface Sci.*, 1983, **93**, 169-183.
- [S2] Y. Kazemzadeh, S. Sourani, M. Reyhani, A. Shabani and E. Maghami, *Open Access Library Journal*, 2014, **1**, 1-7.
